# Supplementary material
Source: PubMed Central journal article supplement (PMC7598794)
Supplement: NIHMS1639699-supplement-supp_material.pdf [file NIHMS1639699-supplement-supp_material.pdf]

Web Appendix for "A Note on Congeniality for Missing Data  
in the Presence of Auxiliary Covariates"

Michael J. Daniels and Xuan Luo

## Simulation Tables from Section 4

Table 1: Imputation Parameter Setting 3: Comparison of non-MBC-F analysis (U) with saturated compatible (SC) and the constraint compatible (CC). We denote approaches that have all available auxiliary covariates as U\*, SC\*, and CC\* and only necessary auxiliary covariates as U, SC, and CC. Results based on 1000 simulated datasets with sample size 200, 500, 20000, and 100000. Monte Carlo standard errors are in parentheses.

| Size   | Parameter             | U*            | SC*           | CC*           | U             | SC            | CC            |
|--------|-----------------------|---------------|---------------|---------------|---------------|---------------|---------------|
| 200    | Bias $\beta_0$        | -0.003(0.004) | -0.002(0.004) | -0.004(0.004) | -0.002(0.004) | -0.002(0.004) | -0.001(0.004) |
|        | Bias $\beta_1$        | 0.001(0.003)  | 0.003(0.003)  | 0.004(0.003)  | 0.001(0.003)  | 0.003(0.003)  | 0.003(0.003)  |
|        | Bias $\beta_2$        | 0.01(0.007)   | 0.005(0.007)  | -0.001(0.007) | 0.003(0.007)  | 0.005(0.007)  | -0.001(0.005) |
|        | $10^3$ *MSE $\beta_0$ | 23.4(0.85)    | 22.0(0.86)    | 24.5(0.85)    | 21.9(0.85)    | 22.0(0.86)    | 19.9(0.85)    |
|        | $10^3$ *MSE $\beta_1$ | 7.2(0.32)     | 7.4(0.32)     | 7.2(0.31)     | 7.4(0.33)     | 7.3(0.32)     | 7.2(0.32)     |
|        | $10^3$ *MSE $\beta_2$ | 56.0(2.4)     | 54.1(2.3)     | 52.3(2.3)     | 54.5(2.4)     | 51.1(2.0)     | 50.8(2.2)     |
| 500    | Bias $\beta_0$        | -0.003(0.003) | -0.003(0.003) | -0.005(0.003) | -0.003(0.003) | -0.003(0.003) | -0.003(0.003) |
|        | Bias $\beta_1$        | -0.001(0.002) | -0.002(0.002) | 0.001(0.002)  | 0.00(0.002)   | -0.002(0.002) | 0.00(0.002)   |
|        | Bias $\beta_2$        | 0.007(0.004)  | 0.006(0.004)  | 0.005(0.004)  | 0.005(0.004)  | 0.006(0.004)  | 0.003(0.004)  |
|        | $10^3$ *MSE $\beta_0$ | 12.8(0.52)    | 12.1(0.52)    | 16.3(0.52)    | 12.5(0.52)    | 12.1(0.52)    | 11.7(0.52)    |
|        | $10^3$ *MSE $\beta_1$ | 3.0(0.14)     | 3.0(0.14)     | 2.9(0.14)     | 2.9(0.14)     | 3.0(0.13)     | 2.9(0.14)     |
|        | $10^3$ *MSE $\beta_2$ | 3.0(1.2)      | 30.8(1.2)     | 29.3(1.2)     | 29.7(1.2)     | 29.2(1.2)     | 28.8(1.1)     |
| 20000  | Bias $\beta_0$        | 0.00(0.00)    | 0.00(0.00)    | -0.001(0.00)  | 0.00(0.00)    | 0.00(0.00)    | 0.00(0.00)    |
|        | Bias $\beta_1$        | 0.00(0.00)    | 0.00(0.00)    | 0.00(0.00)    | 0.00(0.00)    | 0.00(0.00)    | 0.00(0.00)    |
|        | Bias $\beta_2$        | 0.00(0.001)   | 0.00(0.001)   | 0.00(0.001)   | 0.00(0.001)   | 0.00(0.001)   | 0.00(0.001)   |
|        | $10^3$ *MSE $\beta_0$ | 1.0(0.01)     | 1.1(0.01)     | 1.1(0.00)     | 0.90(0.01)    | 1.1(0.01)     | 0.71(0.01)    |
|        | $10^3$ *MSE $\beta_1$ | 0.08(0.00)    | 0.08(0.00)    | 0.07(0.00)    | 0.08(0.00)    | 0.08(0.00)    | 0.07(0.00)    |
|        | $10^3$ *MSE $\beta_2$ | 0.45(0.01)    | 0.51(0.01)    | 0.46(0.01)    | 0.44(0.01)    | 0.50(0.01)    | 0.45(0.01)    |
| 100000 | Bias $\beta_0$        | -0.001(0.00)  | 0.00(0.00)    | 0.00(0.00)    | -0.001(0.00)  | 0.00(0.00)    | 0.00(0.00)    |
|        | Bias $\beta_1$        | 0.00(0.00)    | 0.00(0.00)    | 0.00(0.00)    | 0.00(0.00)    | 0.00(0.00)    | 0.00(0.00)    |
|        | Bias $\beta_2$        | 0.00(0.00)    | 0.00(0.00)    | 0.00(0.00)    | 0.00(0.00)    | 0.00(0.00)    | 0.00(0.00)    |
|        | $10^3$ *MSE $\beta_0$ | 0.12(0.00)    | 0.09(0.00)    | 0.08(0.00)    | 0.03(0.00)    | 0.003(0.00)   | 0.03(0.00)    |
|        | $10^3$ *MSE $\beta_1$ | 0.02(0.00)    | 0.02(0.00)    | 0.02(0.00)    | 0.02(0.00)    | 0.02(0.00)    | 0.02(0.00)    |
|        | $10^3$ *MSE $\beta_2$ | 0.13(0.01)    | 0.12(0.01)    | 0.11(0.01)    | 0.10(0.01)    | 0.10(0.01)    | 0.10(0.01)    |

Table 2: Imputation Parameter Setting 3 Simulation results: Posterior 90% and 95% Confidence Interval coverage rates for the 6 different models (U\*, SC\*, CC\*, U, SC, and CC). Results are based on 1000 simulated datasets each for sample sizes of 200, 500, 20000, and 100000.

| Size   | Parameter | U* 90 | SC* 90 | CC* 90 | U 90 | SC 90 | CC 90 | U* 95 | SC* 95 | CC* 95 | U 95 | SC 95 | CC 95 |
|--------|-----------|-------|--------|--------|------|-------|-------|-------|--------|--------|------|-------|-------|
| 200    | $\beta_0$ | 0.89  | 0.88   | 0.88   | 0.90 | 0.89  | 0.89  | 0.94  | 0.94   | 0.94   | 0.94 | 0.94  | 0.94  |
|        | $\beta_1$ | 0.90  | 0.91   | 0.91   | 0.91 | 0.91  | 0.91  | 0.96  | 0.95   | 0.96   | 0.95 | 0.95  | 0.95  |
|        | $\beta_2$ | 0.90  | 0.90   | 0.90   | 0.90 | 0.90  | 0.91  | 0.95  | 0.96   | 0.96   | 0.95 | 0.96  | 0.96  |
| 500    | $\beta_0$ | 0.90  | 0.91   | 0.90   | 0.91 | 0.91  | 0.91  | 0.95  | 0.95   | 0.95   | 0.95 | 0.95  | 0.95  |
|        | $\beta_1$ | 0.90  | 0.90   | 0.91   | 0.90 | 0.90  | 0.91  | 0.95  | 0.94   | 0.94   | 0.95 | 0.94  | 0.94  |
|        | $\beta_2$ | 0.89  | 0.90   | 0.90   | 0.90 | 0.90  | 0.90  | 0.94  | 0.94   | 0.94   | 0.94 | 0.95  | 0.95  |
| 20000  | $\beta_0$ | 0.90  | 0.90   | 0.90   | 0.90 | 0.90  | 0.90  | 0.94  | 0.94   | 0.95   | 0.94 | 0.94  | 0.95  |
|        | $\beta_1$ | 0.90  | 0.90   | 0.91   | 0.91 | 0.90  | 0.91  | 0.95  | 0.95   | 0.96   | 0.95 | 0.95  | 0.96  |
|        | $\beta_2$ | 0.90  | 0.90   | 0.90   | 0.90 | 0.90  | 0.90  | 0.94  | 0.94   | 0.95   | 0.94 | 0.95  | 0.95  |
| 100000 | $\beta_0$ | 0.89  | 0.90   | 0.90   | 0.90 | 0.90  | 0.90  | 0.95  | 0.95   | 0.95   | 0.95 | 0.95  | 0.95  |
|        | $\beta_1$ | 0.90  | 0.90   | 0.90   | 0.90 | 0.90  | 0.90  | 0.95  | 0.95   | 0.95   | 0.95 | 0.95  | 0.95  |
|        | $\beta_2$ | 0.89  | 0.90   | 0.90   | 0.90 | 0.90  | 0.90  | 0.94  | 0.95   | 0.95   | 0.95 | 0.96  | 0.96  |
